# Supplementary material
Source: Springer Nature journal article supplement (https://www.springermedizin.de/resource/supplementary/12885_2011_3194_MOESM1_ESM.pdf/9462996)
Supplement: MOESM1 [file 9462996]

**Additional File 1:** Primer sequences used for semi-quantitative real-time reverse transcriptase PCR of candidate genes identified with the GINI technique.

| Gene            | Forward or Reverse | 5'-3' Sequence            |
|-----------------|--------------------|---------------------------|
| <i>GAPDH</i>    | Forward            | CTGCACCACCAACTGCTTAG      |
| <i>GAPDH</i>    | Reverse            | GTCTTCTGGGTGGCAGTGAT      |
| <i>PPARGC1A</i> | Forward            | GGCAGAAGGCAATTGAAGAG      |
| <i>PPARGC1A</i> | Reverse            | CATAGCTGTCTCCATCATCCC     |
| <i>WNT5A</i>    | Forward            | AGGGTGATGCAGATAGGCAG      |
| <i>WNT5A</i>    | Reverse            | GCGGTAGCCATAGTCGATGT      |
| <i>RAB3B</i>    | Forward            | CAGAGCAGCTTGGGTTTGAT      |
| <i>RAB3B</i>    | Reverse            | AGAGACGCGTGTTCTTGGAG      |
| <i>CD14</i>     | Forward            | GGGATATAAGAGGCAGCCG       |
| <i>CD14</i>     | Reverse            | CCTCTGAGCTCCGGACAG        |
| <i>METRNL</i>   | Forward            | GTCTGCGCCGTGCC            |
| <i>METRNL</i>   | Reverse            | AGGTGGATGGCTGAGTCCT       |
| <i>BMP6</i>     | Forward            | GTGCAGACCTTGGTTCACCT      |
| <i>BMP6</i>     | Reverse            | ACAAGCTCTTACAACCATATTCCTG |
| <i>GRSF1</i>    | Forward            | CTCCAGATAATAAGGGTGAAGCA   |
| <i>GRSF1</i>    | Reverse            | GAAGCAATTAACCCAAAACACC    |
